# Supplementary material
Source: publisher figshare collection journal article supplement (https://acs.figshare.com/ndownloader/files/4765306)

## **Stereoselective Functionalization of 1'-Position of 4'-Thionucleosides**

Prashantha Gunaga, Hea Ok Kim, Hyuk Woo Lee, Dilip K. Tosh, Jae-Sang Ryu,  
Sun Choi, and Lak Shin Jeong\*

*Laboratory of Medicinal Chemistry, College of Pharmacy, Ewha Womans University,  
Seoul 120-750, Korea*

## **Supporting Information**

### **Table of Contents**

|                                                                              |           |
|------------------------------------------------------------------------------|-----------|
| <b>Experimental procedure -----</b>                                          | <b>S2</b> |
| <b>Copies of <sup>1</sup>H of Compounds 11, 22, and 24-----</b>              | <b>S7</b> |
| <b>Copies of <sup>13</sup>C NMR spectra of Compounds 11, 22, and 24-----</b> | <b>S9</b> |



## Experimental

Ultra violet (UV) spectra were recorded on a Beckman DU-68 spectrometer and  $^1\text{H}$  and  $^{13}\text{C}$  spectra were recorded on Varian-400 (400MHz) using  $\text{CDCl}_3$  or  $\text{CD}_3\text{OD}$  and chemical shifts are reported in parts per million ( $\delta$ ) downfield from tetramethylsilane as internal standard. FAB mass spectra were recorded on Jeol HX 110 spectrometer. Elemental analyses were performed at the general instruments laboratory of Ewha Womans University, Korea. TLC was performed on Merck pre-coated 60F<sub>254</sub> plates. Column chromatography was performed using silica gel 60 (230-400 mesh, Merck). All the anhydrous solvents were distilled over  $\text{CaH}_2$  or  $\text{P}_2\text{O}_5$  or Na/benzophenone prior to the reaction.

### **(2*S*,3*R*)- Acetic acid 2,2-dimethyl-tetrahydro-thieno[3,4-*d*][1,3]dioxol-4-yl ester (9).**

Diol **4** (9.8 g, 44.5 mmol) was dissolved in ethyl acetate (300 mL) and cooled to 0 °C with ice salt mixture. To this mixture was added lead (IV) acetate (39.5 g, 88.97 mmol) portionwise and the mixture was stirred for 1 h at 0 °C and then stirred for 5 h at room temperature. The mixture was filtered through a Celite pad and the filtrate was washed with saturated  $\text{NaHCO}_3$  solution three times and with brine twice, dried with anhydrous  $\text{MgSO}_4$ , filtered, and evaporated under reduced pressure. The resulting syrup was purified by silica gel column chromatography (hexane/ethylacetate = 6/1) to give **2** (6.6 g, 68%): MS (FAB)  $m/z$  241.0 ( $\text{M}+\text{Na}^+$ ); IR 1745  $\text{cm}^{-1}$ ;  $^1\text{H}$  NMR ( $\text{CDCl}_3$ )  $\delta$  1.32 (s, 3 H,  $\text{CH}_3$ ), 1.50 (s, 3 H,  $\text{CH}_3$ ), 2.06 (s, 3 H,  $\text{CH}_3$ ), 3.01 (d, 1 H,  $J = 13.2$  Hz, 4- $\text{H}_a$ ), 3.23 (dd, 1 H,  $J = 4.0, 12.8$  Hz, 4- $\text{H}_b$ ), 4.79 (d, 1 H,  $J = 4.8$  Hz, 2-H), 5.04 (t, 1 H,  $J = 4.8$  Hz, 3-H), 6.01 (s, 1 H, 1-H);  $^{13}\text{C}$  NMR ( $\text{CDCl}_3$ )  $\delta$  21.1, 24.6, 26.1, 38.0, 82.6, 86.7, 88.2, 111.4, 169.0; Anal. Calcd for  $\text{C}_9\text{H}_{14}\text{O}_4\text{S}$ : C, 49.52; H, 6.46; S, 14.69. Found C, 49.88; H, 6.87; S, 14.29.

### **(1*S*,2*S*,3*R*)-2,6-Dichloro-9-(2,2-dimethyl-tetrahydro-thieno[3,4-*d*][1,3]dioxol-4-yl)-9*H*-purine (10).**

2,6-Dichloropurine (5.52 g, 29.2 mmol), ammonium sulfate (655 mg, 4.6 mmol), and HMDS (20 mL) were refluxed under inert and dry conditions for 12 h. The clear solution was evaporated under high vacuum. The resulting solid was redissolved in 1,2-dichloroethane (25 mL) and cooled in ice. To this solution was added dropwise a solution of **9** (5.1 g, 23.4 mmol) in 1,2-dichloroethane (100 mL) followed by addition of TMSOTf (4.96 mL, 30.38 mmol) and the mixture was stirred for 30 minutes at 0 °C and then heated at 70 °C for 4 h. The mixture was cooled, diluted with  $\text{CH}_2\text{Cl}_2$  and washed with saturated  $\text{NaHCO}_3$  solution. The organic layer was dried with  $\text{MgSO}_4$  and evaporated under reduced pressure. The resulting syrup was purified by silica gel



column chromatography (hexane/ethylacetate = 2/1) to give **10** (7.63 g, 94%): UV (MeOH)  $\lambda_{\text{max}}$  276.0 nm (pH 7);  $[\alpha]_{\text{D}}^{25}$  +88.42 (*c* 0.328);  $^1\text{H}$  NMR ( $\text{CDCl}_3$ )  $\delta$  1.37 (s, 3 H,  $\text{CH}_3$ ), 1.59 (s, 3 H,  $\text{CH}_3$ ), 3.26 (d, 1 H,  $J = 12.6$  Hz, 4'- $\text{H}_{\text{a}}$ ), 3.75 (dd, 1 H,  $J = 4.4$ , 12.8 Hz, 4'- $\text{H}_{\text{b}}$ ), 5.22 (d, 1 H,  $J = 5.6$  Hz, 2'-H), 5.33 (t, 1 H,  $J = 4.4$  Hz, 3'-H), 5.88 (s, 1 H, 1'-H), 8.19 (s, 1 H, H-8);  $^{13}\text{C}$  NMR ( $\text{CDCl}_3$ ) 24.8, 26.5, 41.2, 70.6, 84.6, 89.8, 112.1, 131.7, 145.0, 152.3, 152.4, 153.2; Anal. Calcd for  $\text{C}_{12}\text{H}_{12}\text{Cl}_2\text{N}_4\text{O}_2\text{S}$ : C, 41.51; H, 3.48; N, 16.14; S, 9.24. Found C, 41.82; H, 3.85; N, 16.25; S, 9.21.

**(1*R*,2*S*,3*R*)-4-(2,6-Dichloro-purin-9-yl)-2,2-dimethyl-tetrahydro-thieno[3,4-d][1,3]dioxole-4-carboxylic acid methyl ester (11) and (1*R*,2*S*,3*R*)-4-(2,6-Dichloro-purin-9-yl)-2,2-dimethyl-tetrahydro-thieno[3,4-d][1,3]dioxole-4-carboxylic acid ethyl ester (12).**

Compound **10** (2.5 g, 7.2 mmol) was dissolved in dry THF (150 mL) and cooled to -78 °C. To the stirring mixture was added dropwise LiHMDS (7.92 mL, 1 M solution in THF, 7.92 mmol) and the mixture was allowed to stir at -78 °C for 90 min. To this mixture was added dropwise methyl chloroformate (1.67 mL, 21.6 mmol) and the solution was stirred at the same temperature for 2 h. The reaction mixture was poured into water and extracted with ethyl acetate. The organic layer was dried with  $\text{MgSO}_4$  and evaporated under reduced pressure. The resulting syrup was purified by silica gel column chromatography (hexane/ethylacetate = 2/1) to give **11** (2.56 g, 88%):  $^1\text{H}$  NMR ( $\text{CDCl}_3$ )  $\delta$  1.37 (s, 3 H,  $\text{CH}_3$ ), 1.60 (s, 3 H,  $\text{CH}_3$ ), 3.21 (d, 1 H,  $J = 12.4$  Hz, 4'- $\text{H}_{\text{a}}$ ), 3.87 (dd, 1 H,  $J = 4.4$ , 12.8 Hz, 4'- $\text{H}_{\text{b}}$ ), 4.09 (s, 3 H,  $\text{OCH}_3$ ), 5.44 (d, 1 H,  $J = 5.6$  Hz, 2'-H), 5.48 (t, 1 H,  $J = 4.4$  Hz, 3'-H), 6.95 (s, 1 H, H-8);  $^{13}\text{C}$  NMR ( $\text{CDCl}_3$ ) 24.6, 26.6, 41.8, 54.2, 72.0, 86.1, 89.7, 111.8, 129.8, 142.8, 152.9, 154.8, 155.2 and 159.2. Anal. Calcd for  $\text{C}_{14}\text{H}_{14}\text{Cl}_2\text{N}_4\text{O}_4\text{S}$ : C, 41.49; H, 3.48; N, 13.83; S, 7.91. Found C, 41.88; H, 3.86; N, 13.75; S, 7.81.

Similarly, **12** (144 mg, 48%) was also obtained using **10** (250 mg, 0.72 mmol), LiHMDS (1 M solution in THF) (0.80 mL, 0.80 mmol) and ethyl chloroformate (0.185 mL, 2.16 mmol):  $^1\text{H}$  NMR ( $\text{CDCl}_3$ )  $\delta$  1.38 (s, 3 H,  $\text{CH}_3$ ), 1.50 (t, 3 H,  $J = 7.2$  Hz,  $\text{CH}_3$ ), 1.61 (s, 3 H,  $\text{CH}_3$ ), 3.21 (d, 1 H,  $J = 12.4$  Hz, 4'- $\text{H}_{\text{a}}$ ), 3.87 (dd, 1 H,  $J = 4.0$ , 12.4 Hz, 4'- $\text{H}_{\text{b}}$ ), 4.57 (m, 2 H,  $\text{CH}_2$ ), 5.43 (d, 1 H,  $J = 5.2$  Hz, 2'-H), 5.49 (t, 1 H,  $J = 4.0$  Hz, 3'-H), 6.94 (s, 1 H, H-8); Anal. Calcd for  $\text{C}_{15}\text{H}_{16}\text{Cl}_2\text{N}_4\text{O}_4\text{S}$ : C, 42.97; H, 3.85; N, 13.36; S, 7.65. Found C, 42.65; H, 4.11; N, 13.15; S, 7.34.

**(1*S*,2*S*,3*R*)-2-(2,6-Dichloro-purin-9-yl)-tetrahydro-thiophene-3,4-diol (15).**

Compound **12** (1.6 g, 4.6 mmol) was stirred with 2 *N* hydrochloric acid (10 mL) in THF (10 mL) at room temperature for 6 h. The mixture was carefully evaporated under reduced pressure. If the color of the solution turns to green, evaporation must be



immediately stopped. The resulting syrup was purified by silica gel column chromatography ( $\text{CH}_2\text{Cl}_2/\text{MeOH} = 50/1$ ) to give **15** (1.24g, 88%): UV (MeOH)  $\lambda_{\text{max}}$  276.0 nm (pH 7);  $[\alpha]_{\text{D}}^{25} +5.08$  (c 0.46);  $^1\text{H}$  NMR ( $\text{CDCl}_3$ )  $\delta$  3.14 (dd, 1 H,  $J = 2.8, 11.6$  Hz, 4'-H<sub>a</sub>), 3.57 (dd, 1 H,  $J = 4.0, 11.6$  Hz, 4'-H<sub>b</sub>), 3.77 (d, 1 H,  $J = 5.6$  Hz, 2'-H), 4.63 (t, 1 H,  $J = 4.8$  Hz, 3'-H), 5.98 (d, 1 H,  $J = 5.6$  Hz, 1'-H), 8.45 (s, 1 H, H-8);  $^{13}\text{C}$  NMR ( $\text{CDCl}_3$ ) 35.5, 64.9, 74.1, 81.4, 145.3, 150.1, 152.6, 153.2, 153.2; Anal. Calcd for  $\text{C}_9\text{H}_8\text{Cl}_2\text{N}_4\text{O}_2\text{S}$ : C, 35.19; H, 2.63; N, 18.24; S, 10.44. Found C, 35.18; H, 2.85; N, 18.55; S, 10.31.

**(1R,2S,3R)-2-(2,6-Dichloro-purin-9-yl)-3,4-bis-(tetrahydro-pyran-2-yloxy)-tetrahydro-thiophene-2-carboxylic acid methyl ester (19).**

Compound **15** (3.0 g, 9.8 mmol) was taken in  $\text{CH}_2\text{Cl}_2$  (50 mL) along with 3,4-dihydro-2H-pyran (8.91 mL, 97.6 mmol). To this stirring solution was added PPTS (1.22 g, 4.8 mmol) and the mixture was stirred at room temperature for 12 h until the mixture became completely homogeneous. The solution was evaporated at low temperature and the resulting syrup was purified by silica gel column chromatography (hexane/ethylacetate = 2/1) to give **18** (4.33 g, 93%) as a diastereomeric mixture.

The compound **18** (2.1 g, 4.42 mmol) was converted to a diastereomeric mixture of **19** (1.84 g, 78%) using LiHMDS (4.86 mL, 4.86 mmol), methyl chloroformate (1.025 mL, 13.26 mmol) in dry THF (100 mL) following the procedure for the synthesis of **13**: MS (FAB)  $m/z$  555.0 ( $\text{M}+\text{Na}^+$ ); UV ( $\text{CH}_2\text{Cl}_2$ )  $\lambda_{\text{max}} = 291$  nm (pH 7); IR  $1740\text{ cm}^{-1}$ ; Anal. Calcd for  $\text{C}_{21}\text{H}_{26}\text{Cl}_2\text{N}_4\text{O}_6\text{S}$ : C, 47.28; H, 4.91; N, 10.50; S, 6.01. Found C, 47.65; H, 4.51; N, 10.89; S, 6.33.

**(1R,2S,3R)-2-[2-Chloro-6-(3-iodobenzylamino)-purin-9-yl]-3,4-dihydroxy-tetrahydro-thiophene-2-carboxylic acid methylamide (22).**

Compound **19** (250 mg, 0.47 mmol) was converted to  $N^6$ -3-iodobenzylamino derivative (281 mg, 82%) on treatment with 3-iodobenzylamine (152 mg, 0.56 mmol) and then  $N^6$ -3-iodobenzylamino derivative (281 mg, 0.38 mmol) was converted to **20** (146 mg, 52%) by treating with excess methylamine in THF at rt for 2 h. Finally, compound **20** (146 mg, 0.2 mmol) was converted to **22** (51 mg, 46%) according to the procedure used in the synthesis of **19**: MS (FAB)  $m/z$  583.4 ( $\text{M}+\text{Na}^+$ ); UV (MeOH)  $\lambda_{\text{max}} = 303$  nm (pH 7); IR  $1610\text{ cm}^{-1}$ ;  $[\alpha]_{\text{D}}^{25} +71.13$  (c 0.197);  $^1\text{H}$  NMR ( $\text{CDCl}_3$ )  $\delta$  2.85 (dd, 1 H,  $J = 2.4, 11.6$  Hz, 4'-H<sub>a</sub>), 2.91 (s, 3 H,  $\text{CH}_3\text{-NH}$ ), 3.67 (dd, 1 H,  $J = 3.2, 11.2$  Hz, 4'-H<sub>b</sub>), 4.56 (m, 1 H, 2'-H), 4.73 (m, 2 H, Bn), 5.44 (dd, 1 H,  $J = 3.6, 7.6$  Hz, 3'-H), 7.09 (m, 2 H, H-8 and Ph), 7.39 (d, 1 H,  $J = 7.6$  Hz, Ph), 7.61 (m, 1 H, Ph), 7.78 (bs, 1H);  $^{13}\text{C}$  NMR ( $\text{CDCl}_3$ ) 26.4, 37.1, 44.4, 66.1, 75.3, 79.4, 95.1, 119.8, 128.3, 131.5, 137.6, 138.0, 142.8, 143.8, 152.9, 156.4, 157.3, 161.4; Anal. Calcd for  $\text{C}_{18}\text{H}_{18}\text{ClIN}_6\text{O}_3\text{S}$ : C, 38.55; H, 3.24; N, 14.99; S,



5.72 Found C, 38.86; H, 3.17; N, 14.59; S, 5.71.

**(1*R*,2*S*,3*R*)-2-(2-Chloro-6-ethylamino-purin-9-yl)-3,4-dihydroxy-tetrahydro-thiophene-2-carboxylic acid methylamide (23).**

Compound **19** (200 mg, 0.37 mmol) was converted to *N*<sup>6</sup>-ethylamino derivative (158, 79%) on treatment with ethyl amine hydrochloride (36 mg, 0.44 mmol) and Et<sub>3</sub>N (74 mg, 0.74 mmol). *N*<sup>6</sup>-Eethylamino derivative (158 mg, 0.29 mmol) was converted to **21** (86 mg, 56%) by treating with excess methylamine in THF at rt for 2 h. Finally, compound **21** (86 mg, 0.16 mmol) was converted to **23** (30 mg, 51%) according to the procedure used in the synthesis of **19**: MS (FAB) *m/z* 395.1 (M+Na<sup>+</sup>); UV (MeOH) λ<sub>max</sub> = 302 nm (pH 7); IR 1620 cm<sup>-1</sup>; [α]<sub>D</sub><sup>25</sup> +89.12 (*c* 0.202); <sup>1</sup>H NMR (CDCl<sub>3</sub>) δ 1.28 (t, 3 H, *J* = 7.2 Hz, CH<sub>3</sub>), 2.91 (m, 4 H, 4'-H<sub>a</sub> and CH<sub>3</sub>-NH), 3.58 (m, 2 H, CH<sub>2</sub>-NH-C=O), 3.67 (dd, 1 H, *J* = 3.2, 11.2 Hz, 4'-H<sub>b</sub>), 4.57 (dd, 1 H, *J* = 3.6, 5.6 Hz, 2'-H), 5.45 (dd, 1 H, *J* = 3.6, 7.6 Hz, 3'-H), 7.08 (d, 1 H, *J* = 7.2 Hz, H-8); <sup>13</sup>C NMR (CDCl<sub>3</sub>) 14.9, 26.5, 36.6, 37.2, 66.1, 75.3, 79.5, 119.9, 143.4, 152.6, 156.5, 157.4, 161.5; Anal. Calcd for C<sub>13</sub>H<sub>17</sub>ClN<sub>6</sub>O<sub>3</sub>S: C, 41.88; H, 4.60; N, 22.54; S, 8.60 Found C, 41.82; H, 4.66; N, 22.59; S, 8.62.

**(1*R*,2*S*,3*R*)-2-(2-Chloro-6-methylamino-purin-9-yl)-3,4-dihydroxy-tetrahydro-thiophene-2-carboxylic acid methylamide (24).**

To a solution of **19** (250 mg, 0.47 mmol) in ethanol (2 mL) was added methyl amine solution in THF (10 mL) and the mixture was stirred at room temperature for 3 h and evaporated. The residue was purified by silica gel column chromatography (CH<sub>2</sub>Cl<sub>2</sub>/MeOH = 100/1) to give *N*<sup>6</sup>-methylamino derivative (106 mg, 43%).

*N*<sup>6</sup>-methylamino derivative (106 mg, 0.2 mmol) was dissolved in a solution of CH<sub>2</sub>Cl<sub>2</sub>/MeOH = 50/1 (50 mL). To this stirring mixture was added p-toluenesulfonic acid (20 mg) and allowed to stir at room temperature for 30 min. The solution was evaporated under reduced pressure. The residue was purified by PTLC (CH<sub>2</sub>Cl<sub>2</sub>/MeOH = 20/1) to give **24** (35 mg, 49%): MS (FAB) *m/z* 381.1 (M+Na<sup>+</sup>); UV (MeOH) λ<sub>max</sub> = 302.5 nm (pH 7); IR 1625 cm<sup>-1</sup>; [α]<sub>D</sub><sup>25</sup> +79.44 (*c* 0.189); <sup>1</sup>H NMR (CD<sub>3</sub>OD) δ 2.90 (dd, *J*=12.0, 2.0 Hz, 2H, 4'-H<sub>a</sub>), 2.95 (s, 3H), 2.56 (s, 3H), 3.64 (dd, 1 H, *J* = 3.6, 10.6 Hz, 4'-H<sub>b</sub>), 4.57 (m, 1 H, 2'-H), 5.44 (dd, 1 H, *J* = 4.0, 7.2 Hz, 3'-H), 7.06 (d, 1 H, *J* = 7.2 Hz, H-8); <sup>13</sup>C NMR (CD<sub>3</sub>OD) 26.7, 28.0, 37.2, 65.9, 74.8, 79.0, 119.3, 143.6, 152.3, 156.1, 157.9, 161.0; Anal. Calcd for C<sub>12</sub>H<sub>15</sub>ClN<sub>6</sub>O<sub>3</sub>S: C, 40.17; H, 4.21; N, 23.42; S, 8.94 Found C, 40.19; H, 4.23; N, 23.47; S, 8.95.

**(1*R*, 2*S*, 3*R*)-2-(6-Benzylamino-2-chloro-purin-9-yl)-3,4-dihydroxy-tetrahydro-thiophene-2-carboxylic acid benzylamide (25).**

Compound **19** (185 mg) was converted to *N*<sup>6</sup>-benzylamino derivative (156 mg, 49%)



using excess benzylamine in ethanol. *N*<sup>6</sup>-Benzylamino derivative (156 mg, 0.23 mmol) was converted to **25** (50 mg, 43%) according to the procedure for the synthesis of **24**: MS (FAB) *m/z* 533.2 (M+Na<sup>+</sup>); UV (MeOH)  $\lambda_{\text{max}}$  = 303 nm (pH 7); IR 1605 cm<sup>-1</sup>; [ $\alpha$ ]<sub>D</sub><sup>25</sup> +61.03 (*c* 0.112); <sup>1</sup>H NMR (CDCl<sub>3</sub>)  $\delta$  2.88 (dd, 1 H, *J* = 2.0, 11.2 Hz, 4'-H<sub>a</sub>), 3.65 (dd, 1 H, *J* = 3.6, 11.2 Hz, 4'-H<sub>b</sub>), 4.57 (m, 2 H, CH<sub>2</sub>-Ph), 4.76 (m, 1 H, 2'-H), 5.44 (dd, 1 H, *J* = 3.2, 6.8 Hz, 3'-H), 7.04 (d, 1 H, *J* = 6.8 Hz, H-8), 7.24-7.38 (m, 10 H, phenyl); <sup>13</sup>C NMR (CD<sub>3</sub>OD) 37.2, 44.1, 45.1, 66.1, 75.3, 79.6, 128.5, 128.7, 128.9, 129.7, 129.74, 140.1, 142.1, 142.6, 160.2, 160.6, 169.2; Anal. Calcd for C<sub>24</sub>H<sub>23</sub>ClN<sub>6</sub>O<sub>3</sub>S: C, 56.41; H, 4.54; N, 16.45; S, 6.28 Found C, 56.72; H, 4.85; N, 16.25; S, 6.21.



COC(=O)C1=CN2C(=NC(=C2N1)N(C)C3=CC=C(C=C3)C(=O)OC4C(C)OC(=O)C4)N(C)C5=CC=C(C=C5)Cl

**11**

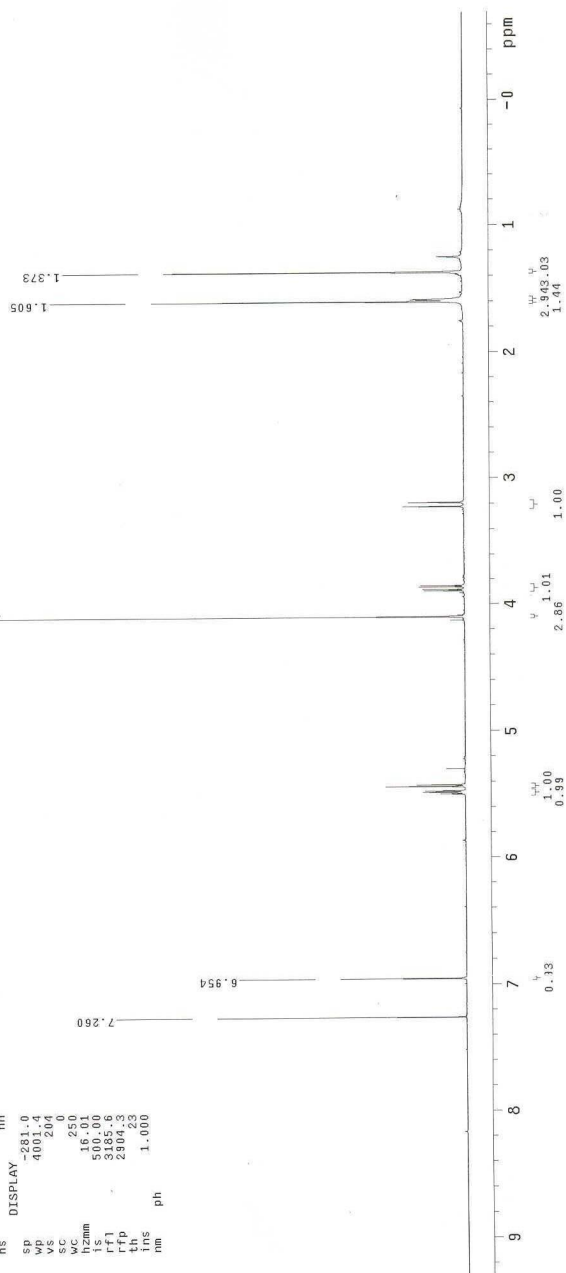



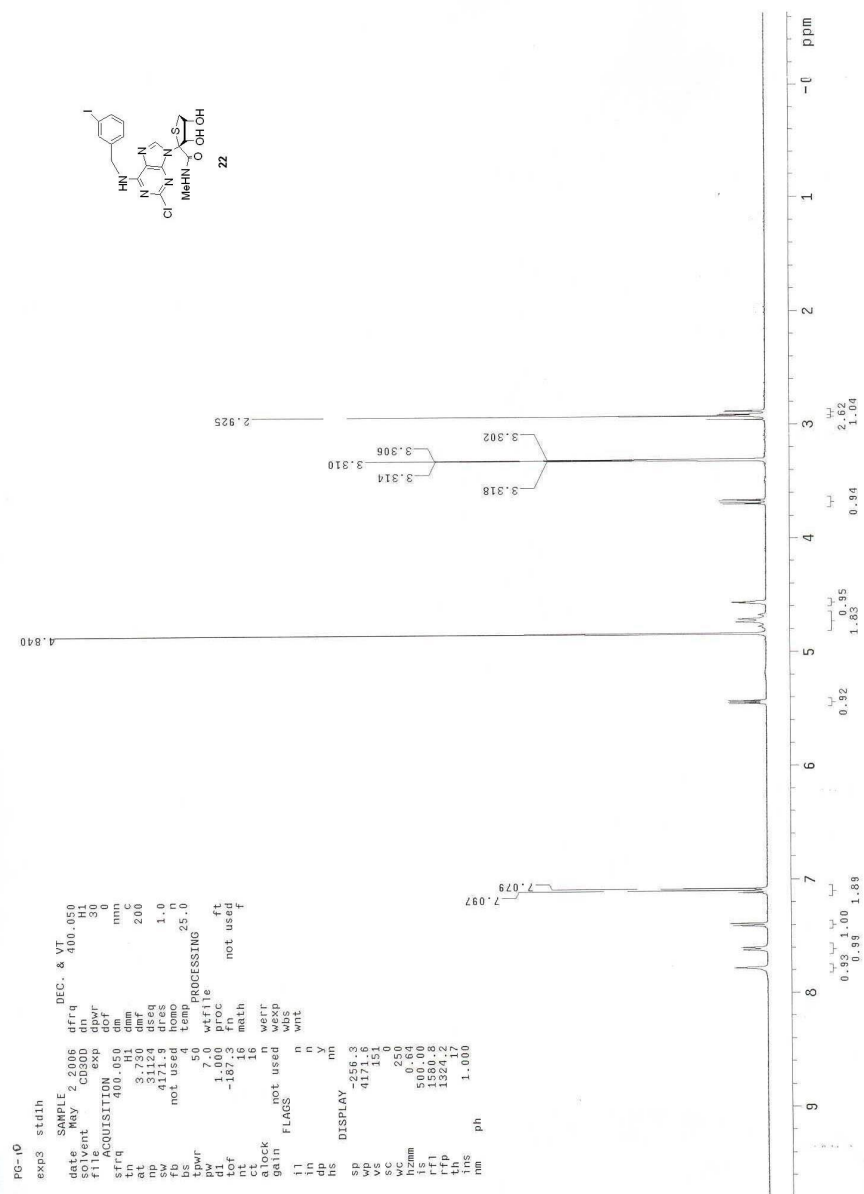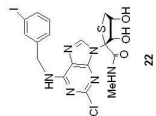



CN1C=NC2=C1N=CN=C2C(=O)N[C@H]3C[C@@H](O)[C@H](O)[C@H]3S

24

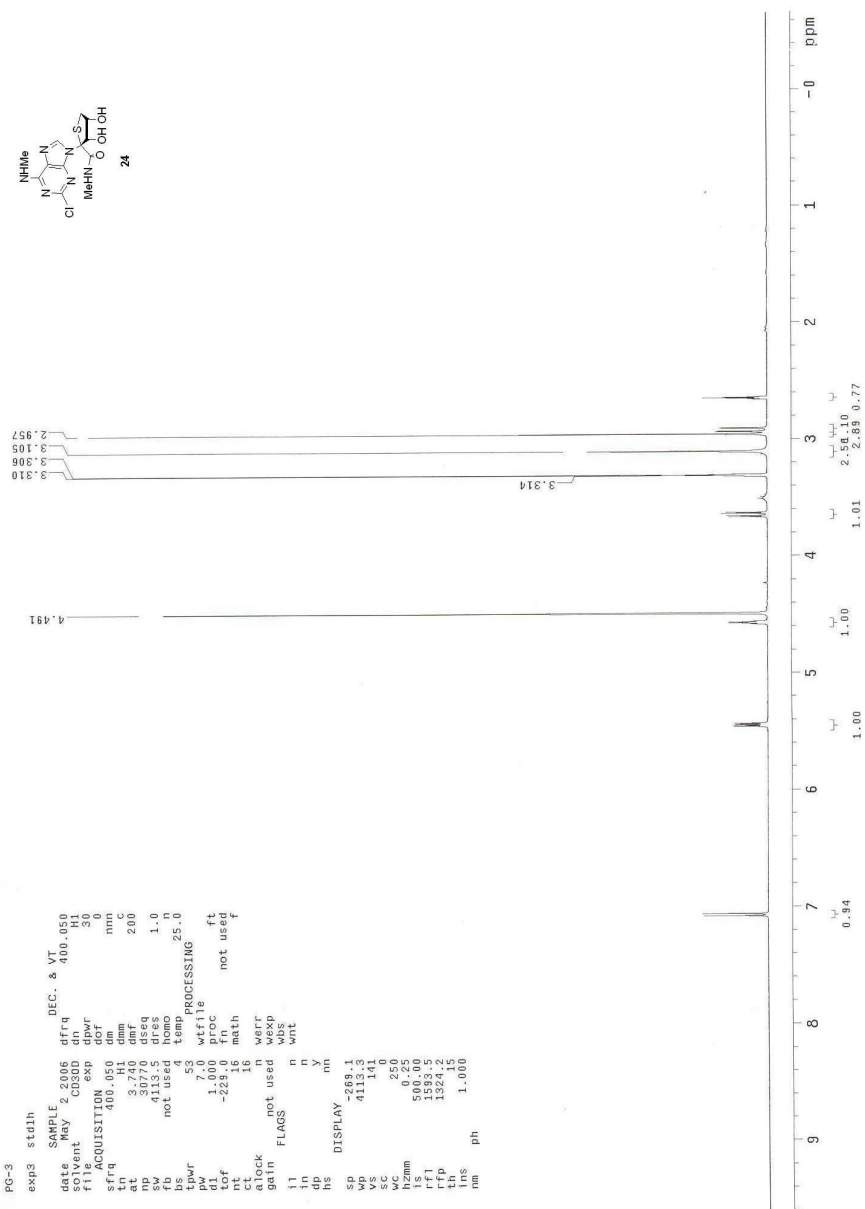



DKT-II-100

exp5 std13c

SAMPLE DEC. & VT  
date May 9 2006 dfrq 400.049  
solvent CDC13 dn H1  
f1 338.4  
ACQUISITION exp dpr 338.4  
sfrq 100.602 dm YYY  
tn 1.03 dnm 10900  
ct 1.00 dres 1.0  
sw 25047.0 dres 1.0  
fb 14000 homo 25.0  
temp 25.0  
PROCCESSING 2.00  
pw 8.8 lb  
d1 2.000 wfile  
d2 2.000 wfile  
nt 20000 fn not used  
ct 17892 math  
alock not used  
gath n wexp  
ll n wnt  
dp v wnt  
hs mn  
DISPLAY 2661.8  
sp 25046.2  
vs 148  
sc 250  
hzmm 6.19  
ls 0.20  
rf 10.05  
rff 7768.7  
th 100.000  
nm pH

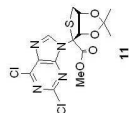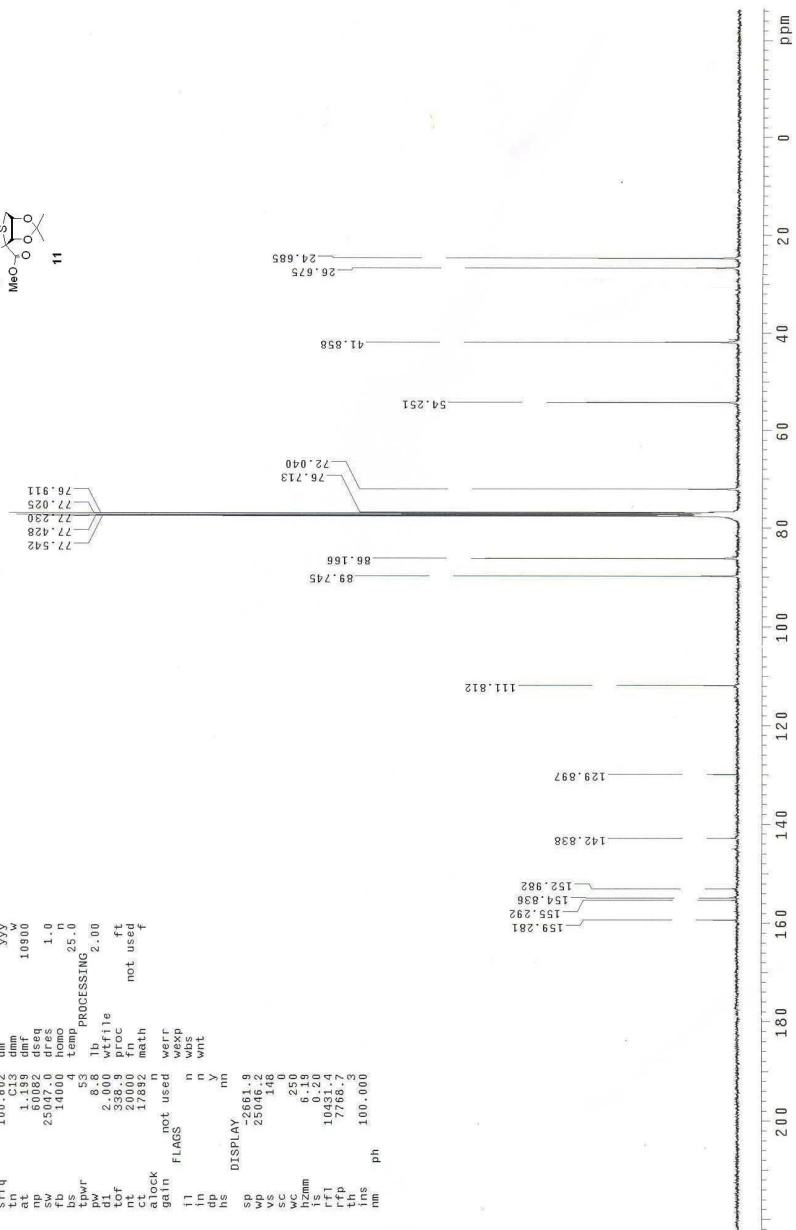







PG-3

exp5 std13c  
 date 2006 DEC. & VT 400.000  
 solvent Ray CD3OD dn 1.1  
 file exp dpr 41  
 sf ACQUISITION 602 338.9  
 tn 100 C13 355.9  
 at 6082 dms 10900  
 sw 25047.0 dres 1.0  
 fb 14000 homo 25.0  
 tpwr 53 PROCESSING 2.00  
 pw 8.8 lb 2.00  
 nt 20000 proc ft  
 tof 338.9 not used  
 clock 17955 math  
 gain not used werr  
 l1 flags n wexp  
 in n wnt  
 ns y  
 display m  
 sp -2546.8  
 wp 25000.0  
 vs 270  
 sc 0  
 hzmm 3282  
 ls 740.20  
 rf 4944.1  
 th 100.000  
 nm ph

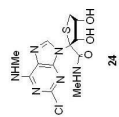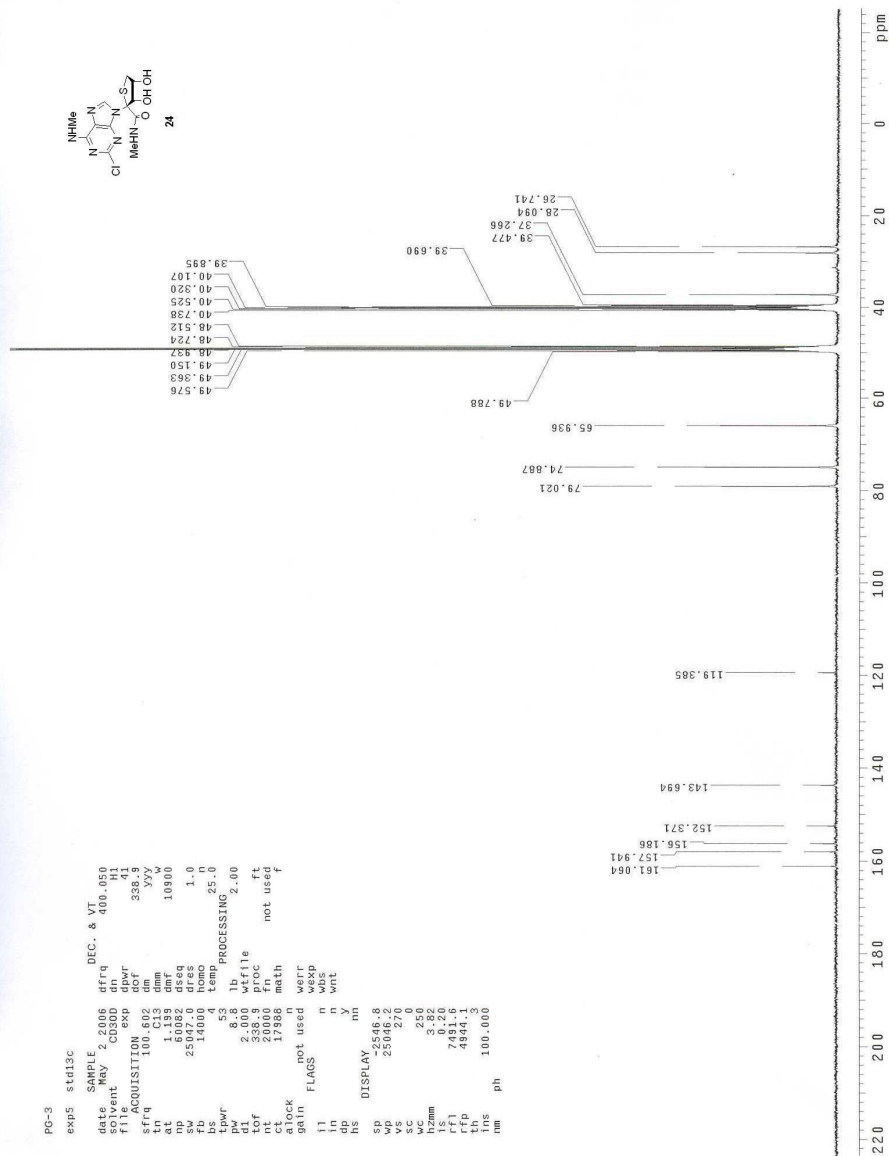

Supplement: Supplementary file 1 [file 4765306]
